# Supplementary material for: Synthesis of 3D composite materials based on ultrathin LDH nanowalls grown in situ on graphene surface and fast-response NO2 gas sensing performance at room temperature
Source: Royal Society of Chemistry journal article supplement (doi:10.1039/d4ce00773e), 2024-01-01
Supplement: d4ce00773e1.pdf [file d4ce00773e1.pdf]

## Supporting Information

Changhe Guo,<sup>a</sup> Chong Lin<sup>a</sup>, Fangjie Qin<sup>a</sup>, Yuancao Wu<sup>a</sup>, Rui Zhang<sup>c</sup>, Li Li<sup>\*a,b</sup> and Keying Shi <sup>\*a</sup>

a. Key Laboratory of Functional Inorganic Material Chemistry, Ministry of Education, School of Chemistry and Material Science, Heilongjiang University, Harbin, P. R. China

b. College of Modern Agriculture and Ecological Environment, Heilongjiang University, Harbin 150080, P. R. China

c. School of Chemistry and Chemical Engineering, Yancheng Institute of Technology, Yancheng 224051 China

**\*Corresponding author**

Tel.: +86 451 86604920; +86 451 86609141

E-mail: lili1993036@hlju.edu.cn, shikeying2008@163.com

|             |                                                                                                                                      |   |
|-------------|--------------------------------------------------------------------------------------------------------------------------------------|---|
| Fig.S1      | Self-assembled gas sensor diagram.....                                                                                               | 1 |
| Fig.S2      | SEM images of NF/rGOz;NF/rGO1; NF/rGO2; NF/rGO3. ....                                                                                | 1 |
| Fig.S3      | AFM images height profiles of GO. ....                                                                                               | 2 |
| Fig.S4      | The dynamical response/recovery transient curves.....                                                                                | 2 |
| Fig.S5      | Work function of NF-LDHs and rGO.....                                                                                                | 3 |
| Table S1    | XRD parameters of NF/rGO series and NF-LDHs .....                                                                                    | 3 |
| Table S2    | O1s peaks position and peak area ratio of NF-LDHs and NF/rGO.....                                                                    | 3 |
| Table S3    | The response, response time and recovery time of the three samples expose to NO <sub>2</sub> concentrations at room temperature..... | 4 |
| Table S4    | Parameters obtained by fitting experimental curve to equivalent circuit.....                                                         | 5 |
| Table S5    | Current performance of typical gas sensors based on bimetallic composites in literature reports.....                                 | 5 |
| References. | .....                                                                                                                                | 6 |

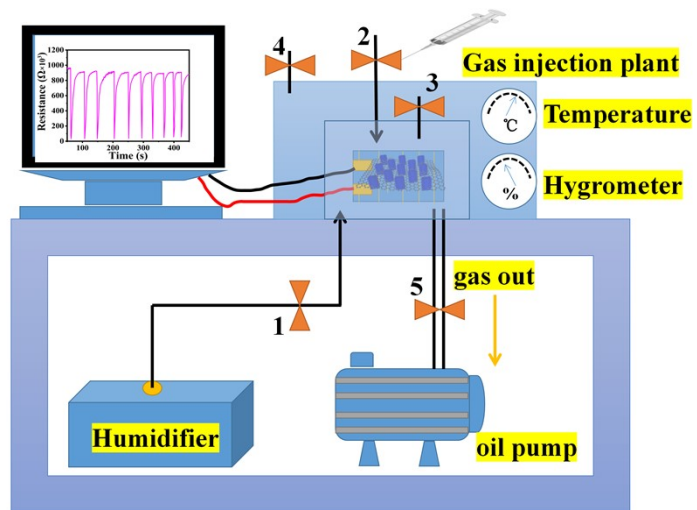

**Fig.S1** Self-assembled gas sensor diagram

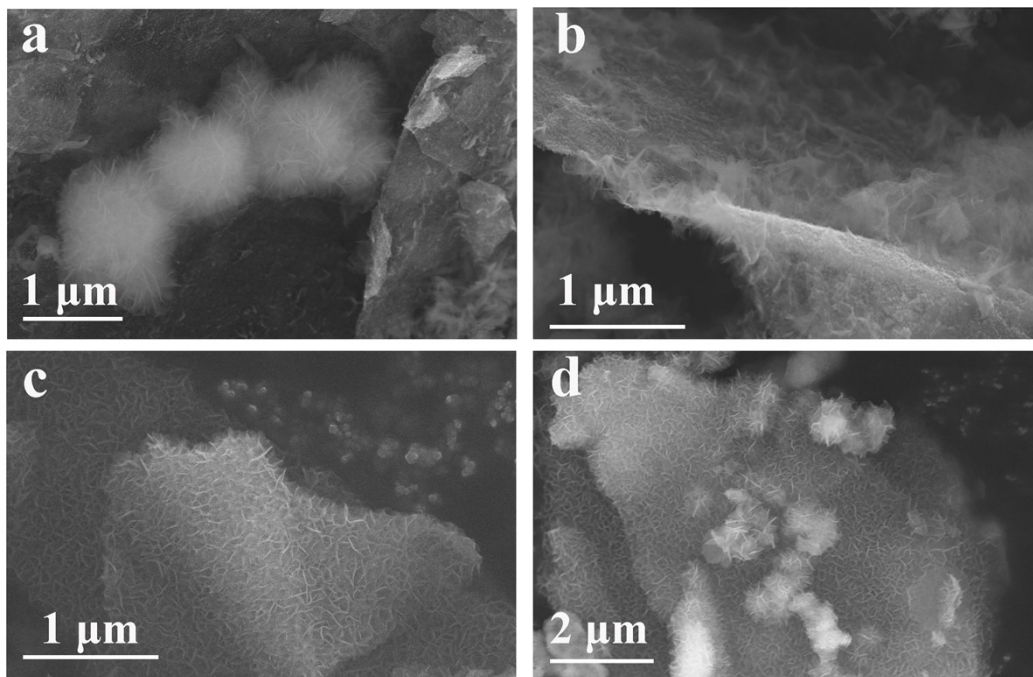

**Fig.S2** SEM images of NF/rGOz;NF/rGO1; NF/rGO2; NF/rGO3

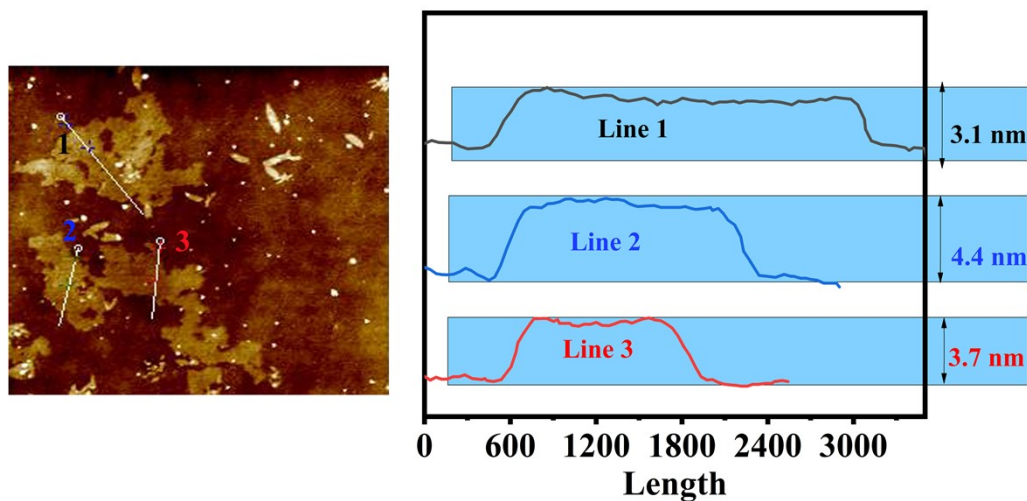

**Fig S3** AFM images height profiles of GO

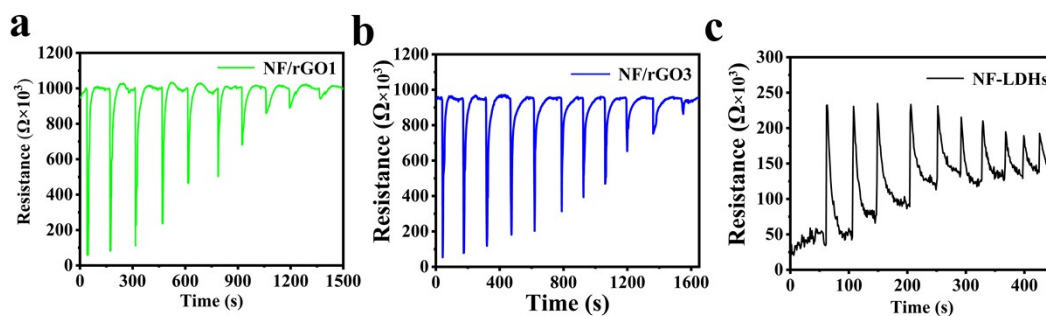

**Fig. S4** The dynamical response/recovery transient curves of  
(a)NF/rGO1,(b)NF/rGO3 and (c) NF-LDHs sensor to 100-0.1 ppm NO<sub>2</sub>.

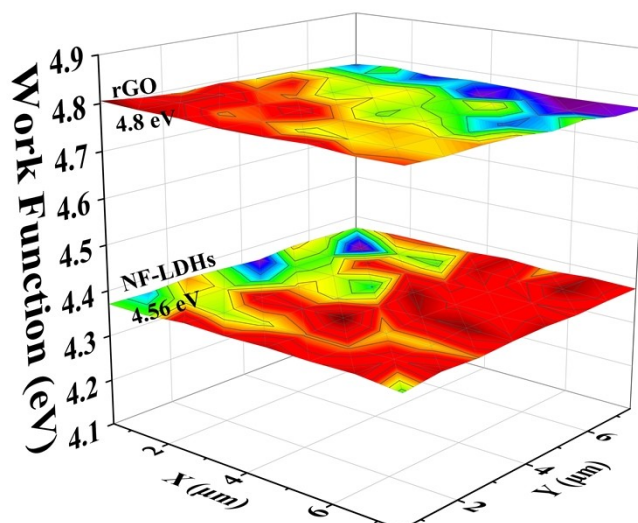

**Fig. S5** Work function of NF-LDHs and rGO

**Table S1** XRD parameters of NF/rGO series and NF-LDHs

| Samples | D <sub>003</sub> /nm | D <sub>110</sub> /nm | I <sub>110</sub> /I <sub>003</sub> |
|---------|----------------------|----------------------|------------------------------------|
| NF-LDHs | 24.55                | 36.875               | 0.18                               |
| NF/rGO1 | 6.145                | 23.779               | 0.24                               |
| NF/rGO2 | 7.769                | 13.433               | 0.35                               |
| NF/rGO3 | 7.946                | 8.9123               | 0.21                               |

\*Based on Scherrer equation  $D=0.89 \lambda / \beta \cos \theta$ , D is Lattice dimension (nm);  $\beta$  is the full width at half-maximum( in radian );  $\theta$  is diffraction angle;  $\lambda$  is the wavelength of X-rays 0.1542 nm

\*The diffraction intensity ratio of ( 110 ) line to ( 003 ) line

**Table S2** O1s peaks position and peak area ratio of NF-LDHs and NF/rGO

| Samples              | NF-LDHs        |                |                | NF/rGO2        |                |                |
|----------------------|----------------|----------------|----------------|----------------|----------------|----------------|
|                      | O <sub>a</sub> | O <sub>b</sub> | O <sub>c</sub> | O <sub>a</sub> | O <sub>b</sub> | O <sub>c</sub> |
| Energy position (eV) | 530.7          | 531.7          | 533.6          | 531.2          | 532.0          | 533.3          |
| Peak area ratio (%)  | 38.06          | 45.03          | 16.9           | 18.96          | 49.42          | 31.6           |

**Table S3 The response, response time and recovery time of the three samples expose to NO<sub>2</sub> concentrations at room temperature (RH: 26%)**

| Sample                | NF/rGO1 |      |      | NF/rGO2 |      |      | NF/rGO3 |      |      | NF-LDHs |     |      |
|-----------------------|---------|------|------|---------|------|------|---------|------|------|---------|-----|------|
| NO <sub>2</sub> (ppm) | R       | Ts   | Tr   | R       | Ts   | Tr   | R       | Ts   | Tr   | R       | Ts  | Tr   |
| 100                   | 16.5    | 2.4  | 56.9 | 22.3    | 2.3  | 46   | 17.6    | 4.3  | 63.3 | 6.6     | 2.4 | 32   |
| 50                    | 11.96   | 3    | 46   | 18.6    | 3.2  | 34   | 12.03   | 11.1 | 45.2 | 5.1     | 2.5 | 29.3 |
| 30                    | 8.63    | 3.5  | 32   | 15.6    | 4.8  | 29.6 | 7.96    | 14.4 | 35.4 | 3.25    | 2.5 | 26.2 |
| 10                    | 4.2     | 5.2  | 26   | 12.7    | 6.32 | 24.5 | 5.21    | 17.6 | 29.2 | 2.57    | 2.6 | 23.6 |
| 5                     | 2.13    | 6.2  | 21.3 | 9.24    | 8.01 | 21.6 | 4.67    | 18.4 | 25.4 | 2.05    | 2.8 | 20.2 |
| 3                     | 1.98    | 7.3  | 18.1 | 7.57    | 8.6  | 16.6 | 3.02    | 23.6 | 21.9 | 1.51    | 3.1 | 18.8 |
| 1                     | 1.46    | 9.4  | 15.6 | 4.26    | 9.3  | 14.3 | 2.41    | 24.3 | 16.5 | 1.50    | 3.2 | 17.5 |
| 0.5                   | 1.16    | 10.2 | 14.3 | 3.17    | 11.3 | 14.3 | 1.96    | 26.1 | 14.4 | 1.49    | 5.4 | 15.7 |
| 0.3                   | 1.12    | 11.3 | 12.6 | 2.45    | 12.3 | 12.8 | 1.45    | 27.5 | 12.3 | 1.42    | 6.8 | 12.3 |
| 0.1                   | 1.06    | 12.1 | 11.3 | 1.92    | 13.6 | 11.6 | 1.26    | 29.1 | 11.2 | 1.41    | 7.1 | 10.2 |
| 0.05                  |         |      |      | 1.32    | 13.8 | 10.3 | 1.09    | 30   | 10.7 |         |     |      |
| 0.01                  |         |      |      | 1.12    | 13.9 | 10.2 |         |      |      |         |     |      |

**\*R: Response; Ts: Response time; Tr: Recovery time**

**Table S4 Parameters obtained by fitting experimental curve to equivalent circuit**

| Raw materials | $N_d$                 | $R_1(\Omega)$      | $C_1(F)$               | $R_2(\Omega)$      | $C_2(F)$               |
|---------------|-----------------------|--------------------|------------------------|--------------------|------------------------|
| NF-LDHs       | $2.89 \times 10^{15}$ | $1.63 \times 10^5$ | $1.52 \times 10^{-12}$ | $4.97 \times 10^6$ | $8.96 \times 10^{-11}$ |
| NF/rGO1       | $2.19 \times 10^{16}$ | $7.32 \times 10^5$ | $1.14 \times 10^{-10}$ | $1.45 \times 10^5$ | $9.81 \times 10^{-12}$ |
| NF/rGO2       | $2.78 \times 10^{16}$ | $7.06 \times 10^6$ | $1.20 \times 10^{-10}$ | $1.44 \times 10^5$ | $1.10 \times 10^{-11}$ |
| NF/rGO3       | $2.01 \times 10^{16}$ | $5.78 \times 10^5$ | $1.33 \times 10^{-10}$ | $1.94 \times 10^5$ | $1.00 \times 10^{-11}$ |

\* $N_d = - (2/e_0 \varepsilon \varepsilon_0) [d(1/C^2)/dV]^{-1}/C^2$  is the slope of the curve,  $q$  is the charge constant ( $q=1.69 \times 10^{11}$ ),  $\varepsilon_0$  is the vacuum dielectric constant ( $8.859 \times 10^{-14} \text{ F cm}^{-1}$ ), and  $\varepsilon$  is the relative dielectric constant of NiFe-LDHs ( $\varepsilon = 20$ )

**Table S5 Current performance of typical gas sensors based on bimetallic composites in literature reports**

| Samples                  | Application        | Operation temperature | Response/concentration | References |
|--------------------------|--------------------|-----------------------|------------------------|------------|
| Ag/ NiAl-LDHs            | Ethanol gas sensor | RT                    | 10.89/250 ppm          | [1]        |
| ZnTi-LDHs/<br>Ti 3C 2 Tx | NH <sub>3</sub>    | RT                    | 1.26/100 ppb           | [2]        |
| PANI/ZnTi-LDHs           | NH <sub>3</sub>    | RT                    | 9.91/5 ppm             | [3]        |
| Zn-Cr-WO-LDHs            | Cl <sub>2</sub>    | RT                    | 60%/100 ppm            | [4]        |
| Co-AlLDHs                | NO <sub>2</sub>    | RT                    | 17.09/100 ppm          | [5]        |
| CoAl-LDH                 | NO <sub>2</sub>    | RT                    | 26.61/100 ppm          | [6]        |
| Ni-Al-LDH                | O <sub>3</sub>     | RT                    | 1.84/700 ppb           | [7]        |
| ZnV/ZnCr-LDHs            | SO <sub>2</sub>    | RT                    | 71.71%/100 ppm         | [8]        |
| PS@Co-LDH                | Ethanol vapour     | 200°C                 | 2.48/4.3 ppm           | [9]        |
| Zn-TiLDHs/rGO            | NO <sub>2</sub>    | RT                    | 97%/100 ppm            | [10]       |
| NiFe LDH/rGO             | NO <sub>2</sub>    | RT                    | 22.3/100 ppm           | This work  |

## References

- [1]S. A. Zakaria, S. H. Ahmadi and M. H. Amini, *Materials Chemistry and Physics*,2024, **318**,129216.
- [2]Y. Qin, H. Gui, Y. Bai and S. Liu, *Sensors and Actuators B: Chemical* ,2022, **352**, 131077.
- [3]Y. X. Qin L. P. Wang and X. F. Wang, *Organic Electronics*,2019, **66**, 102-109.
- [4]R. B. Shinde, A. S. Patil, S. Sadavar, V, Y. M. Chitare, V. V. Magdum, N. S. Padalkar, U. M. Patil, S. T. Kochuveedu, V. G. Parale and H. H. Park, *Sensors and Actuators B: Chemical*,2022, **352**,131046.
- [5]D. Wang, Z. Liu, Y. Hong, C. Lin, Q. Pan, L. Li and K. Shi, *RSC Advances*,2020, **10**,34466-34473.
- [6]Z. Liu, L. Teng, L. Ma, Y. Liu, X. Zhang, J. Xue, M. Ikram, M. Ullah, L. Li and K. Shi, *RSC Advances*,2019, **9**, 21911.
- [7]G. Kang, Z. Zhu, B. H. Tang, C. H. Wu and R. J. Wu, *Sensors & Actuators: B. Chemical*,2017, **241**, 1203-1209.
- [8]R. B. Shinde, N. S. Padalkar and S. V. Sadavar, *Materials Today Chemistry*,2022, **24**,100801.
- [9]Y. Li, F. Zhou, L. Gao and G. Duan, *Sensors & Actuators: B. Chemical*,2018, **261**, 553-565.
- [10]Y. Qin, R. Zhao and C. Bai, *New Journal of Chemistry*,2020, **44**, 16985-16994.
